# Supplementary material for: Cretaceous fire-resistant angiosperms
Source: Research Square preprint supplement (doi:10.21203/rs.3.rs-494355/v1), 2021-05-25
Supplement: Supplementary file 3 [file cfdfce263ccd26940abc0b0d.xlsx]

## Sheet: Sheet1
Extended Data Table 1. Morphology characters used in this study. Polymorphic states are represented by letters as follows: B = (34), P = (01), Q = (12), V = (234). Unknown and inapplicable states are coded "?"."--"indicate this character can not coded for this species.
Tribes	Taxon	1	2	3	4	5	6	7	8	9	10	11	12	13	14	15	16	17	18	19	20	21	22	23	24	25	26	27	28	29	30	31	32	33	34
Outgroup	Barbeya oleoides	1	1	1	1	1	1	0	1	0	1	1	1	P	Q	0	2	?	1	0	0	0	?	1	1	?	?	P	0	0	0	?	？	?	?
	Dirachma socotrana	1	1	0	0	1	1	0	1	?	2	0	0	1	B	0	2	?	1	0	0	1	0	1	?	?	?	3	1	0	0	?	?	?	?
Doerpfeldieae	Doerpfeldia cubensis	1	1	0	0	1	0	0	1	1	2	1	?	1	3	1	?	0	1	1	0	0	——	0	0	2	1	1	1	0	0	0	0	0	0
Ampelozizipheae	Ampeloziziphus amazonicus	1	1	0	0	1	0	1	1	1	1	1	0	1	3	1	1	2	1	1	0	1	1	0	0	0	1	2	1	0	0	0	0	0	0
Bathiorhamneae	Bathiorhamnus cryptophorus	1	1	0	0	1	0	0	1	1	1	1	?	1	3	1	1	0	1	1	0	1	1	0	0	0	1	2	1	0	0	0	0	0	0
Colletieae	Discaria chacaye	1	1	0	1	1	0	0	1	1	1	1	1	1	3	1	1	1	0	1	0	1	1	0	0	1	0	Q	1	0	0	0	0	0	0
	Colletia ulicina	0	1	1	1	1	1	0	1	1	1	1	1	1	3	1	1	1	0	1	0	1	1	0	0	1	0	Q	1	0	0	0	0	0	0
Gouanieae	Pleuranthodes hillebrandii	1	1	0	0	1	?	1	0	1	2	0	1	1	3	1	1	2	1	1	1	1	1	0	0	0	0	1	1	1	0	0	0	0	0
Ventilagineae	Ventilago viminalis	1	1	0	0	1	1	1	1	1	0	1	1	1	3	1	1	1	1	1	0	1	1	0	0	0	?	1	1	0	1	0	0	0	0
	Ventilago leiocarpa	1	1	0	0	1	1	1	1	1	0	1	1	1	3	1	1	1	1	1	0	1	1	0	0	0	?	1	1	0	1	0	0	0	0
NA	Sageretia elegans	1	1	0	1	1	1	0	1	1	2	1	1	1	0	1	1	2	1	1	0	1	1	0	0	1	1	1	1	0	0	0	0	0	0
Rhamneae	Berchemia lineata	1	1	0	0	1	1	0	1	1	0	1	1	1	0	1	1	0	1	1	0	1	1	0	0	1	1	1	1	0	0	0	0	0	0
	Scutia buxifolia	1	1	0	0	1	1	0	1	1	1	1	1	1	3	1	1	0	1	1	0	1	1	0	0	1	1	1	1	0	0	0	0	0	0
	Rhamnus cathartica	1	1	0	0	1	1	0	1	1	1	1	1	1	2	1	2	0	1	1	0	1	1	0	0	1	1	1	1	0	0	0	0	0	0
	Rhamnus alaternus	1	1	0	0	1	1	0	1	1	1	1	1	1	2	1	2	0	1	1	0	1	1	0	0	1	1	1	1	0	0	0	0	0	0
	Reynosia uncinata	1	1	0	1	1	1	0	1	1	1	0	1	1	3	1	2	0	1	1	0	1	1	0	0	1	1	0	1	0	0	0	0	0	0
	Condalia microphylla	1	1	0	2	1	1	0	1	1	2	1	1	1	3	1	2	0	1	1	0	1	1	0	0	1	1	1	1	0	0	0	0	0	0
	Krugiodendron ferreum	1	1	0	0	1	1	0	1	1	2	1	1	1	3	1	2	?	1	1	0	1	1	0	0	1	1	1	1	0	0	0	0	0	0
	Rhamnella franguloides	1	1	0	0	1	1	0	1	1	1	1	0	1	3	1	0	2	1	1	1	1	1	0	0	1	1	1	1	0	0	0	0	0	0
	Karwinskia humboldtiana	1	1	0	1	1	1	0	1	1	1	1	1	1	3	1	1	0	1	1	0	1	1	0	0	1	1	1	1	0	0	0	0	0	0
	Rhamnidium elaeocarpum	1	1	0	1	1	1	0	1	1	1	1	1	1	3	1	1	0	1	1	0	1	1	0	0	1	1	1	1	0	0	0	0	0	0
Maesopsideae	Maesopsis eminii	1	1	0	1	1	1	0	1	1	1	1	1	1	3	1	1	0	1	1	0	1	1	0	0	1	1	0	1	0	0	0	0	0	0
Paliureae	Hovenia trichocarpa	1	1	0	0	1	0	0	1	1	2	1	1	1	3	1	1	0	1	0	0	1	1	0	0	0	0	2	1	0	0	0	0	0	0
Gouanieae	Helinus integrifolous	1	1	0	0	1	1	1	0	1	2	1	1	1	3	1	1	2	1	1	0	1	1	0	0	0	0	Q	1	1	0	0	0	0	0
	Gouania mauritiana	1	1	0	0	1	0	1	0	1	2	1	1	1	3	1	1	2	1	1	0	1	1	0	0	0	0	Q	1	1	0	0	0	0	0
	Crumenaria polygaloides	1	1	0	0	1	?	1	1	1	0	1	1	1	3	1	1	2	1	1	0	1	1	0	0	0	0	Q	1	1	0	0	0	0	0
	Reissekia smilacina	1	1	0	0	1	1	1	0	1	1	1	1	1	3	1	1	2	1	1	0	1	1	0	0	0	0	Q	1	1	0	0	0	0	0
NA	Lasiodiscus mildbraedii	1	1	0	1	1	1	0	1	1	0	1	1	1	3	1	1	2	1	1	0	1	1	0	0	0	0	2	1	0	0	0	0	0	0
Paliureae	Paliurus spina-christi	1	1	0	0	1	0	0	1	1	2	1	1	1	3	1	2	1	1	0	0	1	1	0	0	0	1	1	1	0	0	0	0	0	0
	Ziziphus brunoniana	1	1	0	2	1	0	0	1	1	1	1	1	1	3	1	2	1	1	1	0	1	1	0	0	0	1	1	1	0	0	0	0	0	0
	Ziziphus celata	1	1	0	2	1	0	0	1	1	1	1	1	1	3	1	2	1	1	1	0	1	1	0	0	0	1	1	1	0	0	0	0	0	0
NA	Emmenosperma alphitonioidees	1	1	1	1	1	1	0	1	1	2	1	1	1	3	1	1	?	1	1	0	1	1	0	0	0	0	1	1	0	0	0	0	0	0
NA	Colubrina asiatica	1	1	0	0	1	1	0	1	1	1	1	1	1	3	1	1	2	1	0	0	1	1	0	0	0	0	Q	1	0	0	0	0	0	0
NA	Colubrina reclinate	1	1	0	0	1	1	0	1	1	1	1	1	1	3	1	1	2	1	0	0	1	1	0	0	0	0	Q	1	0	0	0	0	0	0
NA	Alphitonia incana	1	1	0	0	1	1	0	1	1	0	1	1	1	3	1	1	2	1	0	0	1	1	0	0	0	0	1	1	0	0	0	0	0	0
Pomaderrae	Trymalium ledifolium	0	1	0	0	0	1	0	1	0	0	1	0	1	3	1	1	2	1	0	0	1	1	0	0	0	0	Q	1	0	0	0	0	0	0
	Trymalium elacho[hyllum	0	1	0	0	0	1	0	1	0	0	1	0	1	3	1	1	2	1	0	0	1	1	0	0	0	0	Q	1	0	0	0	0	0	0
	Spyridium forrestianum	1	1	0	0	0	1	0	1	0	0	1	0	1	3	1	1	2	1	0	0	1	1	0	0	0	0	Q	1	0	0	0	0	0	0
	Spyridium globulosum	1	1	0	0	0	1	0	1	0	0	1	0	1	3	1	1	2	1	0	0	1	1	0	0	0	0	Q	1	0	0	0	0	0	0
	Cryptandra spyridioides	1	1	0	0	0	1	0	1	0	0	0	0	1	3	1	1	2	0	0	1	1	1	0	0	0	0	Q	1	0	0	0	0	0	0
	Pomaderris rugosa	1	1	0	0	0	1	0	1	0	0	0	0	1	3	1	1	1	0	0	1	1	1	0	0	0	0	Q	1	0	0	0	0	0	0
	Siegfriedia darwinioides	0	1	0	1	0	1	0	1	0	1	1	1	1	3	1	1	2	1	0	0	1	1	0	0	0	0	Q	1	0	0	0	0	0	0
NA	Schistocarpaea johnsonii	1	1	0	0	?	1	0	1	1	1	1	1	1	3	1	1	0	1	0	0	1	1	0	0	?	0	Q	1	0	0	0	0	0	0
NA	Ceanothus coeruleus	1	1	0	1	0	1	0	1	1	2	1	0	1	3	1	1	0	1	1	0	1	1	0	0	0	0	2	1	0	0	0	0	0	0
Phyliceae	Nesiota elliptica	1	1	1	1	0	1	0	1	1	2	1	1	1	V	1	1	2	1	0	0	1	1	0	0	0	0	3	1	0	0	0	0	0	0
	Noltea africana	1	1	0	0	1	1	0	1	1	2	1	1	1	3	1	1	1	1	1	0	1	1	0	0	0	0	2	1	0	0	0	0	0	0
	Eophylica steburmitsis	0	0	1	0	0	1	0	1	0	0	0	0	1	5	1	0	2	0	0	1	0	——	0	0	0	0	2	1	0	0	0	0	0	0
	Phylica affinis	0	0	1	0	0	1	0	1	1	0	0	0	1	3	1	0	2	0	0	1	1	1	0	0	0	0	2	1	0	0	0	0	0	0
	Phylica trachyphylla	0	0	1	0	0	1	0	1	1	0	0	0	1	3	1	0	2	0	0	1	1	1	0	0	0	0	2	1	0	0	0	0	0	0
	Phylica lachneaeoides	0	0	1	0	0	1	0	1	1	0	0	0	1	3	1	0	2	0	0	1	1	1	0	0	0	0	2	1	0	0	0	0	0	0
	Phylica lasiantha	0	0	1	0	0	1	0	1	1	0	0	0	1	3	1	0	2	0	0	1	1	1	0	0	0	0	2	1	0	0	0	0	0	0
	Phylica stenantha	0	0	1	0	0	1	0	1	1	0	0	0	1	3	1	0	2	0	0	1	0	——	0	0	0	0	2	1	0	0	0	0	0	0
	Phylica arborea	0	0	1	0	0	1	0	1	1	0	0	0	1	3	1	0	2	0	0	1	1	1	0	0	0	0	2	1	0	0	0	0	0	0
	Eophylica piloburmitsis	0	0	1	0	0	1	0	1	1	0	0	0	1	3	1	0	2	0	0	1	1	1	0	0	0	0	？	1	0	0	0	0	0	0
	Phylica curvifolia	0	0	1	0	0	1	0	1	1	0	0	0	1	3	1	0	2	0	0	1	1	1	0	0	0	0	2	1	0	0	0	0	0	0
	Phylica pubescens	0	0	1	0	0	1	0	1	1	0	0	0	1	3	1	0	2	0	0	1	1	1	0	0	0	0	2	1	0	0	0	0	0	0
	Phylica rigida	0	0	1	0	0	1	0	1	1	0	0	0	1	3	1	0	2	0	0	1	0	——	0	0	0	0	2	1	0	0	0	0	0	0
	Phylica buxifolia	0	0	1	0	0	1	0	1	1	0	0	0	1	3	1	0	2	0	0	1	1	1	0	0	0	0	2	1	0	0	0	0	0	0
	Phylica leipoldtii	0	0	1	0	0	1	0	1	1	0	0	0	1	3	1	0	2	0	0	1	0	——	0	0	0	0	2	1	0	0	0	0	0	0
	Phylica obtusifolia	0	0	1	0	0	1	0	1	1	0	0	0	1	3	1	0	2	0	0	1	0	——	0	0	0	0	2	1	0	0	0	0	0	0
	Phylica willdenowiana	0	0	1	0	0	1	0	1	1	0	0	0	1	3	1	0	2	0	0	1	1	1	0	0	0	0	2	1	0	0	0	0	0	0
	Phylica incurvata	0	0	1	0	0	1	0	1	1	0	0	0	1	3	1	0	2	0	0	1	1	1	0	0	0	0	2	1	0	0	0	0	0	0
	Phylica purpurea	0	0	1	0	0	1	0	1	1	0	0	0	1	3	1	0	2	0	0	1	1	1	0	0	0	0	2	1	0	0	0	0	0	0
	Phylica oleifolia	0	0	1	0	0	1	0	1	1	0	0	0	1	3	1	0	2	0	0	1	1	1	0	0	0	0	2	1	0	0	0	0	0	0
	Phylica aemula	0	0	1	0	0	1	0	1	1	0	0	0	1	3	1	0	2	0	0	1	0	——	0	0	0	0	2	1	0	0	0	0	0	0
	Phylica villosa	0	0	1	0	0	1	0	1	1	0	0	0	1	3	1	0	2	0	0	1	1	1	0	0	0	0	2	1	0	0	0	0	0	0
	Phylica cryptandroides	0	0	1	0	0	1	0	1	1	0	0	0	1	3	1	0	2	0	0	1	1	1	0	0	0	0	2	1	0	0	0	0	0	0
	Phylica odorata	0	0	1	0	0	1	0	1	1	0	0	0	1	3	1	0	2	0	0	1	0	——	0	0	0	0	2	1	0	0	0	0	0	0
	Phylica harveyi	0	0	1	0	0	1	0	1	1	0	0	0	1	3	1	0	2	0	0	1	1	1	0	0	0	0	2	1	0	0	0	0	0	0
	Phylica imberbis	0	0	1	0	0	1	0	1	1	0	0	0	1	3	1	0	2	0	0	1	1	1	0	0	0	0	2	1	0	0	0	0	0	0
	Note: All species were listed following MP phylogenetic tree in Fig.3A of the main text. NA indicates that this species was not belong to the tribe of previous suggested.
